# Supplementary material for: Fibroblast state switching orchestrates dermal maturation and wound healing
Source: PubMed Central journal article supplement (PMC6113774; doi:10.15252/msb.20178174), 2018-08-29
Supplement: MSB-14-e8174-s010.pdf [file MSB-14-e8174-s010.pdf]

## Fibroblast state switching orchestrates dermal maturation and wound healing

Emanuel Rognoni, Angela Oliveira Pisco, Toru Hiratsuka, Kalle Sipilä, Julio M. Belmonte, Seyedeh Atefeh Mobasser, Christina Philippeos, Rui Dilão and Fiona M. Watt.

---

|                         |                     |                                |
|-------------------------|---------------------|--------------------------------|
| <b>Review timeline:</b> | Submission date:    | 18 <sup>th</sup> December 2017 |
|                         | Editorial Decision: | 23 <sup>rd</sup> February 2018 |
|                         | Revision received:  | 11 <sup>th</sup> June 2018     |
|                         | Editorial Decision: | 10 <sup>th</sup> July 2018     |
|                         | Revision received:  | 2 <sup>nd</sup> August 2018    |
|                         | Accepted:           | 3 <sup>rd</sup> August 2018    |

---

Editor: Maria Polychronidou

### Transaction Report:

(Note: With the exception of the correction of typographical or spelling errors that could be a source of ambiguity, letters and reports are not edited. The original formatting of letters and referee reports may not be reflected in this compilation.)

1st Editorial Decision

23<sup>rd</sup> February 2018

---

Thank you again for submitting your work to Molecular Systems Biology. We have now heard back from the two referees who agreed to evaluate your study. As you will see below, the reviewers think that the presented findings seem interesting. They raise however a series of concerns, which we would ask you to address in a revision of the manuscript.

The reviewers' recommendations are rather clear and therefore I think that there is no need to repeat all the points listed below. One particularly important point raised by both reviewers refers to the need to provide further evidence supporting the causal relationship between the ECM and cell proliferation. Please let me know in case you would like to discuss further any of the issues raised by the reviewers.

-----

### REFeree REPORTS

Reviewer #1:

#### Summary

This paper analyzes the role of fibroblasts and extracellular matrix in the development of homeostasis and the response to wounding in mammalian skin. Motivated by experiments in embryonic and neonatal mice that show an inverse correlation between fibroblast proliferation and extracellular matrix (ECM) density and that quiescent fibroblasts are more efficient at producing ECM than those that proliferate, the authors hypothesized that the ECM negatively regulates fibroblast proliferation and this regulation plays a key role in determining the structure of the dermis.

To elucidate this process, the authors develop several mathematical models that range from well-mixed (spatially homogeneous) models to 3D models of the dermis that account for spatiotemporal interactions of multiple cell types. The models suggest that the negative feedback hypothesis is sufficient to achieve dermal homeostasis. The models suggest that active cell migration is not needed for maturation of the dermis (developmental approach to homeostasis), but that active migration is an important component of wound healing. Live imaging in mice confirms these conclusions.

#### General remarks

How tissues reach their correct size with the right distribution and numbers of cells and how these tissues regenerate after perturbations are fundamental problems in Developmental Biology that are still not well understood. This is an interesting study that tackles these questions for the dermal layer of mammalian skin and introduces what appears to be a new idea—a negative feedback loop between ECM and fibroblasts—for control of the dermal structure. The idea that active motion of fibroblasts is not needed for maturation is also interesting. It is to be expected that active motion is needed to heal wounds, however. The paper should be of interest to Developmental Biologists in general and Skin Biologists in particular and to Systems Biologists who seek to understand problems in Development through theoretical and computational methodologies.

#### Major Points

The data presented convincingly show that there is a correlation between ECM deposition and fibroblast proliferation. The mathematical models and the data suggest that this feedback is sufficient to characterize the approach to homeostasis during both maturation and wound healing. However, is the relationship between proliferation and ECM really causal? Could the authors provide evidence that it is the ECM that induces the anti-proliferative effect and not another signaling factor (e.g., produced by the fibroblasts themselves or other cells in the dermis) that induces quiescence? The result of this could be the same as the proposed mechanism but would provide a different interpretation of the results that would be important to know. The 3D tissue model that the authors use is based on the Cellular Potts model developed originally by Granier-Glazier-Hogeweg and implemented in the CompuCell3D framework. This is an appropriate modeling choice but unfortunately there are insufficient details presented either in the main text or the supplementary material for this reviewer to judge the simulations. In particular, there are numerous assumptions and it would be important to know which assumptions are critical to the authors' conclusions.

#### Minor Points

There are a number of typos in the paper that need to be corrected. The authors need to go over the manuscript carefully and also make sure all the text is consistent with the figures.

P6. Proliferative fibroblasts are "blue" in Fig EV3A.

P7. Epidermal signal strength was assumed to decline with age. Why? The authors should provide a reference

P9. Top paragraph. The figure references do not match the actual figure panels. (e.g., Fig 4I and 4G)

P20. Fig 1A caption. The references to the "left" and "right" panels are reversed.

P21. Fig 2 caption. "GF" is not defined.

Fig 2: What does % ECM density mean?

Fig EV1: Panel A. 1:4 should be 4:1

Fig EV5. Panel B. The text overlaps the region of interest

#### Reviewer #2:

The manuscript by Rognoni et al. describes a combined experimental and modeling work that focuses on understanding the spatiotemporal dynamics of dermis maturation during normal development and wound healing. The main premise of the manuscript is that the interrelation between proliferation and extracellular matrix (ECM) deposition underlies these processes. The

authors propose a model where fibroblast cells can switch between proliferating fibroblast (PF) and quiescent fibroblast (QF) states. They propose that the quiescent cells secrete ECM that inhibits the proliferating state and enhances the quiescent state. Experimentally, it is shown that proliferation is inversely proportional to ECM deposition both during normal maturation and during wound healing. It is also shown that during normal maturation there is no cell migration, but during wound healing there is a significant fibroblast migration from areas next to the wound.

The authors develop a mathematical model to describe the relation between proliferation, ECM and cell migration. They develop three types of models: (1) A non-spatial regulatory network model describing the feedback between PFs, QFs, and ECM. (2) A 1D reaction-diffusion type model that describes cellular dynamics of wound healing in a simplified 1D geometry. (3) A detailed cellular Potts model that describes both normal dermis maturation and wound healing process in 3D.

Overall the manuscript is well written, and the results provide compelling experimental and theoretical insights into the organization of the Dermis. It also fits quite well the scope of the MSB journal. However, there are a few important points that need to be addressed before it is accepted.

These include:

Major comments:

1. One of the main conjectures in the manuscript is that the ECM inhibits the proliferating state (PF) by enhancing the transition from that state to the quiescent state. The evidence for this feedback relies on the correlation between the increase of ECM and the decrease in proliferation. However, that correlation does not necessarily imply causation. It is important to provide evidence that inhibition of ECM deposition increases proliferation. It could be that the decline of proliferation is controlled by some other cellular process upstream of the ECM deposition.

2. Furthermore, on the modeling side, the authors should compare a mathematical model with a feedback of the ECM on PF (K4) to a model without such a feedback (but with some upstream signal that controls both decay in proliferation and ECM deposition). Are there unique features that can be explained only by the feedback model?

3. The authors argue that no active migration is required for the maturation process. The evidence to support that is a 200min movie (movie EV2) showing only small movement. This seems to me too short a movie to make this point as the maturation process proceeds over many days. I therefore think that a longer movie is required to make this point. Alternatively, the authors should quantitate the effective cell diffusion in their current movies and show that is consistent with no significant migration.

4. The authors use both a simplified 1D model (Fig. 5) and a 3D cellular Potts model to show wound closure. However, these models are fundamentally different in their assumptions. The 1D model simply assumes that the cell can diffuse into the wound. This seems an oversimplified assumption, as it well known that cells perform directional migration in response to signal from the wound. In fact, the author show that very nicely in movie EV6. This type of directional movement is inconsistent with random diffusion assumed in that model. I think that it would be much more insightful to introduce into the 1D model directed random walk.

5. The detailed 3D model shows that with the right assumptions, the wound closure can be recapitulated. However, the details are unclear. Information on the assumptions made and the details of the model are not provided. There is a general reference to previous work but this is not enough. In particular, it is not clear which features are required and which are not. For example, the detailed simulation (Fig. 6A) includes both blood clot and infiltrating immune cells. Are these two types required for the model to work? If so, under what conditions?

It also includes Epidermis proliferation in response to the wound healing. Is that also necessary? More generally, the model should provide insights into the essential processes sufficient for recapitulating the process and not only provide a nice movie that looks like the real behavior. It would be useful to perform some parameter sensitivity which would identify the essential parameters for the process.

6. As mentioned above, the authors should provide a more complete description of the 3D model and its parameters, as they have done for the 1D model.

Minor point:

1. The authors use the acronym MCS in multiple figure to denote time but do not define it anywhere.

**Point-by-point reply to the reviewers****Reviewer #1:****Major Points**

The data presented convincingly show that there is a correlation between ECM deposition and fibroblast proliferation. The mathematical models and the data suggest that this feedback is sufficient to characterize the approach to homeostasis during both maturation and wound healing. However, is the relationship between proliferation and ECM really causal? Could the authors provide evidence that it is the ECM that induces the anti-proliferative effect and not another signaling factor (e.g., produced by the fibroblasts themselves or other cells in the dermis) that induces quiescence? The result of this could be the same as the proposed mechanism but would provide a different interpretation of the results that would be important to know.

We thank the reviewer for this important point, which was also raised by Reviewer 2. To obtain experimental evidence for a causal relationship between fibroblast proliferation and ECM deposition we have now included two new experimental approaches in a new figure (Fig.2). First, we show that fibroblasts reversibly stop proliferating when encased in a collagen gel. Secondly, we show that when dermal ECM is subjected to collagenase digestion fibroblasts resume proliferation. In both models the transition of fibroblasts between quiescence and proliferation occurs independently of an immune cell infiltrate. The new in vitro experiments demonstrate the strong interdependence of fibroblast proliferation and ECM deposition and strongly support our feedback model.

The 3D tissue model that the authors use is based on the Cellular Potts model developed originally by Granier-Glazier-Hogeweg and implemented in the CompuCell3D framework. This is an appropriate modeling choice but unfortunately there are insufficient details presented either in the main text or the supplementary material for this reviewer to judge the simulations. In particular, there are numerous assumptions and it would be important to know which assumptions are critical to the authors' conclusions.

We thank the reviewer for raising this point. We have now created a GitHub repository, where we have uploaded the 3D model (<https://github.com/aopisco/DermisMaturation>). Additionally the methods section has been expanded to provide the information that was lacking previously. Our work can now be easily reproduced and expanded, a critical feature for the systems biology/computational biology community.

**Minor Points**

There are a number of typos in the paper that need to be corrected. The authors need to go over the manuscript carefully and also make sure all the text is consistent with the figures.

We have now corrected these errors.

P6. Proliferative fibroblasts are "blue" in Fig EV3A.

This is now stated in the text.

P7. Epidermal signal strength was assumed to decline with age. Why? The authors should provide a reference.

We have now cited Lichtenberger et al., 2016 and Collins et al., 2011 in the text.

P9. Top paragraph. The figure references do not match the actual figure panels. (e.g., Fig 4I and 4G) P20.

This has now been corrected.

Fig 1A caption. The references to the "left" and "right" panels are reversed.

This has now been corrected.

P21. Fig 2 caption. "GF" is not defined.

This information is now added to the figure legend.

Fig 2: What does % ECM density mean?

We have replaced the Figure legend to make this clear.

Fig EV1: Panel A. 1:4 should be 4:1.

We have now changed this.

Fig EV5. Panel B. The text overlaps the region of interest.

We have moved the text outside of the figure.

**Reviewer #2:**

**Major comments:**

1. One of the main conjectures in the manuscript is that the ECM inhibits the proliferating state (PF) by enhancing the transition from that state to the quiescent state. The evidence for this feedback relies on the correlation between the increase of ECM and the decrease in proliferation. However, that correlation does not necessarily imply causation. It is important to provide evidence that inhibition of ECM deposition increases proliferation. It could be that the decline of proliferation is controlled by some other cellular process upstream of the ECM deposition.

We thank the reviewer for pointing this out, in common with Reviewer 1, who raised the same point. To obtain experimental evidence for a causal relationship between fibroblast proliferation and ECM deposition we have now included two new experimental approaches in a new figure (Fig.2). First, we show that fibroblasts reversibly stop proliferating when encased in a collagen gel. Secondly, we show that when dermal ECM is subjected to collagenase digestion fibroblasts resume proliferation. In both models the transition of fibroblasts between quiescence and proliferation occurs independently of an immune cell infiltrate. The new in vitro experiments demonstrate the strong interdependence of fibroblast proliferation and ECM deposition and strongly support our feedback model.

2. Furthermore, on the modeling side, the authors should compare a mathematical model with a feedback of the ECM on PF (K4) to a model without such a feedback (but with some upstream signal that controls both decay in proliferation and ECM deposition). Are there unique features that can be explained only by the feedback model?

We thank the reviewer for this comment. We have revised the Supplementary File EV1 (now part of Methods) by adding a sentence following equation (6), showing that the non-existence of a negative feedback loop would imply a zero-steady state for PF, QF and ECM, in contradiction with the data.

3. The authors argue that no active migration is required for the maturation process. The evidence to support that is a 200min movie (movie EV2) showing only small movement. This seems to me too short a movie to make this point as the maturation process proceeds over many days. I therefore think that a longer movie is required to make this point. Alternatively, the authors should quantitate the effective cell diffusion in their current movies and show that is consistent with no significant migration.

We agree and have now extended the movie to 700 min. We have also included stills from the later time points (Figure 3G).

4. The authors use both a simplified 1D model (Fig. 5) and a 3D cellular Potts model to show wound closure. However, these models are fundamentally different in their assumptions. The 1D model simply assumes that the cell can diffuse into the wound. This seems an oversimplified assumption, as it well known that cells perform directional migration in response to signal from the wound. In fact, the author show that very nicely in movie EV6. This type of directional movement is inconsistent with random diffusion assumed in that model. I think that it would be much more insightful to introduce into the 1D model directed random walk.

The motivation for using two different assumptions is that we wanted to show that with the simplest assumption, that is, diffusion, could macroscopically recapitulate the observed behaviour. Nevertheless, in the 3D tissue model, we wanted to describe the system more realistically and we can actually account for the directional migration that we observe by live imaging in wound healing.

5. The detailed 3D model shows that with the right assumptions, the wound closure can be recapitulated. However, the details are unclear. Information on the assumptions made and the details of the model are not provided. There is a general reference to previous work but this is not enough. In particular, it is not clear which features are required and which are not. For example, the detailed simulation (Fig. 6A) includes both blood clot and infiltrating immune cells. Are these two types required for the model to work? If so, under what conditions?

It also includes Epidermis proliferation in response to the wound healing. Is that also necessary? More generally, the model should provide insights into the essential processes sufficient for recapitulating the process and not only provide a nice movie that looks like the real behavior. It would be useful to perform some parameter sensitivity which would identify the essential parameters for the process.

We have now revised our methods section to include in detail all the model assumptions and their relevance for the model. Moreover, the code is now available in GitHub: <https://github.com/aopisco/DermisMaturation>. The new experiments in Figure 2A, B establish that the switch between fibroblast proliferation and quiescence can occur in the absence of epidermis, immune cells and a blood clot.

6. As mentioned above, the authors should provide a more complete description of the 3D model and its parameters, as they have done for the 1D model.

This is now provided in the method section.

Minor point:

1. The authors use the acronym MCS in multiple figure to denote time but do not define it anywhere.

We have now defined this in the text.

2nd Editorial Decision

10<sup>th</sup> July 2018

Thank you for sending us your revised manuscript. We have now heard back from reviewer #2 who was asked to evaluate your study. As you will see below the reviewer is satisfied with the modifications made and thinks that the study is now suitable for publication.

We are offering a "model curation service" together with Prof. Jacky Snoep and the FAIRDOM team. In brief, the aim is to enhance reproducibility and add value to papers including mathematical models. Jacky Snoep's summary on the model (\*Model Curation Report\*) is pasted below. As you will see, there are some minor issues, which we would ask you to fix when you submit your revision.

-----  
REFeree REPORTS.

Reviewer #2:

The authors have addressed all the points raised in the first round in an adequate manner. I particularly like the new experiments in Fig.2 showing a causal relation between ECM deposition and proliferation.

The description of the 3D model has also improved significantly.

I therefore recommend accepting the manuscript

**\*\*Model Curation Report\*\***:

The authors sent me a Mathematica notebook with the models described in the MSB manuscript.

I could reproduce the simulation plots in the manuscript, and the model description in the manuscript is in agreement with the notebook.

I have only minor comments for improvement of Figure 3:

1) The schema in Fig. 3a is not consistent with the ODEs. I would advise to show all the rates in the schema, i.e. also include  $k_5$ ,  $k_6$ ,  $k_7$ . In addition I would make a distinction between conversion (e.g. PF to QF) and activation (e.g. ECM effect on  $k_4$ ). Now both types of reactions are shown as a solid arrow. I would suggest to use a dotted arrow for activation, simply to prevent confusion. Thus, show an additional solid line from PF to QF for  $k_4$ , with a dotted arrow from ECM pointing at  $k_4$ . Similarly, QF is not converted to ECM, but rather activates the synthesis, i.e. should be a dotted line.

2) If I am correct ECM in Fig. 3c is not a percentage, but a density, so it should not have units "(%)".

2nd Revision - authors' response

2<sup>nd</sup> August 2018

## 2<sup>ND</sup> Point-by-point reply to the reviewers

### *Model Curation Report*

*I have only minor comments for improvement of Figure 3:*

*1) The schema in Fig. 3a is not consistent with the ODEs. I would advise to show all the rates in the schema, i.e. also include  $k_5$ ,  $k_6$ ,  $k_7$ . In addition I would make a distinction between conversion (e.g. PF to QF) and activation (e.g. ECM effect on  $k_4$ ). Now both types of reactions are shown as a solid arrow. I would suggest to use a dotted arrow for activation, simply to prevent confusion. Thus, show an additional solid line from PF to QF for  $k_4$ , with a dotted arrow from ECM pointing at  $k_4$ . Similarly, QF is not converted to ECM, but rather activates the synthesis, i.e. should be a dotted line.*

*We have changed Fig 3A accordingly.*

*2) If I am correct ECM in Fig. 3c is not a percentage, but a density, so it should not have units "(%)".*

*We have changed the axis labelling accordingly.*

**YOU MUST COMPLETE ALL CELLS WITH A PINK BACKGROUND** ↓

PLEASE NOTE THAT THIS CHECKLIST WILL BE PUBLISHED ALONGSIDE YOUR PAPER

Corresponding Author Name: Fiona M Watt  
 Journal Submitted to: Molecular Systems Biology  
 Manuscript Number: MSB-17-8174

### Reporting Checklist For Life Sciences Articles (Rev. June 2017)

This checklist is used to ensure good reporting standards and to improve the reproducibility of published results. These guidelines are consistent with the Principles and Guidelines for Reporting Preclinical Research issued by the NIH in 2014. Please follow the journal's authorship guidelines in preparing your manuscript.

#### A- Figures

##### 1. Data

##### The data shown in figures should satisfy the following conditions:

- the data were obtained and processed according to the field's best practice and are presented to reflect the results of the experiments in an accurate and unbiased manner.
- figure panels include only data points, measurements or observations that can be compared to each other in a scientifically meaningful way.
- graphs include clearly labeled error bars for independent experiments and sample sizes. Unless justified, error bars should not be shown for technical replicates.
- if  $n < 5$ , the individual data points from each experiment should be plotted and any statistical test employed should be justified
- Source Data should be included to report the data underlying graphs. Please follow the guidelines set out in the author ship guidelines on Data Presentation.

##### 2. Captions

##### Each figure caption should contain the following information, for each panel where they are relevant:

- a specification of the experimental system investigated (eg cell line, species name).
- the assay(s) and method(s) used to carry out the reported observations and measurements
- an explicit mention of the biological and chemical entity(ies) that are being measured.
- an explicit mention of the biological and chemical entity(ies) that are altered/varied/perturbed in a controlled manner.
- the exact sample size (n) for each experimental group/condition, given as a number, not a range;
- a description of the sample collection allowing the reader to understand whether the samples represent technical or biological replicates (including how many animals, litters, cultures, etc.).
- a statement of how many times the experiment shown was independently replicated in the laboratory.
- definitions of statistical methods and measures:
  - common tests, such as t-test (please specify whether paired vs. unpaired), simple  $\chi^2$  tests, Wilcoxon and Mann-Whitney tests, can be unambiguously identified by name only, but more complex techniques should be described in the methods section;
  - are tests one-sided or two-sided?
  - are there adjustments for multiple comparisons?
  - exact statistical test results, e.g., P values = x but not P values < x;
  - definition of "center values" as median or average;
  - definition of error bars as s.d. or s.e.m.

Any descriptions too long for the figure legend should be included in the methods section and/or with the source data.

In the pink boxes below, please ensure that the answers to the following questions are reported in the manuscript itself. Every question should be answered. If the question is not relevant to your research, please write NA (non applicable). We encourage you to include a specific subsection in the methods section for statistics, reagents, animal models and human subjects.

#### B- Statistics and general methods

Please fill out these boxes ↓ (Do not worry if you cannot see all your text once you press return)

|                                                                                                                                                                                         |                                                                                                    |
|-----------------------------------------------------------------------------------------------------------------------------------------------------------------------------------------|----------------------------------------------------------------------------------------------------|
| 1.a. How was the sample size chosen to ensure adequate power to detect a pre-specified effect size?                                                                                     | No specific method was used.                                                                       |
| 1.b. For animal studies, include a statement about sample size estimate even if no statistical methods were used.                                                                       | No statistical method was used to estimate sample size.                                            |
| 2. Describe inclusion/exclusion criteria if samples or animals were excluded from the analysis. Were the criteria pre-established?                                                      | No samples were excluded from the analysis.                                                        |
| 3. Were any steps taken to minimize the effects of subjective bias when allocating animals/samples to treatment (e.g. randomization procedure)? If yes, please describe.                | No                                                                                                 |
| For animal studies, include a statement about randomization even if no randomization was used.                                                                                          | No specific randomization method was used. If not specified otherwise, male and females were used. |
| 4.a. Were any steps taken to minimize the effects of subjective bias during group allocation or/and when assessing results (e.g. blinding of the investigator)? If yes please describe. | No                                                                                                 |
| 4.b. For animal studies, include a statement about blinding even if no blinding was done                                                                                                | No specific blinding method was applied.                                                           |
| 5. For every figure, are statistical tests justified as appropriate?                                                                                                                    | Yes                                                                                                |
| Do the data meet the assumptions of the tests (e.g., normal distribution)? Describe any methods used to assess it.                                                                      | If a statistical test was applied, normal distribution was tested.                                 |
| Is there an estimate of variation within each group of data?                                                                                                                            | Yes                                                                                                |
| Is the variance similar between the groups that are being statistically compared?                                                                                                       | Yes                                                                                                |

#### C- Reagents

|                                                                                                                                                                                                                                                                                                                              |                                                                                                                                                                                                                                                                                                                                                                                                                                                                                                                                                          |
|------------------------------------------------------------------------------------------------------------------------------------------------------------------------------------------------------------------------------------------------------------------------------------------------------------------------------|----------------------------------------------------------------------------------------------------------------------------------------------------------------------------------------------------------------------------------------------------------------------------------------------------------------------------------------------------------------------------------------------------------------------------------------------------------------------------------------------------------------------------------------------------------|
| 6. To show that antibodies were profiled for use in the system under study (assay and species), provide a citation, catalog number and/or clone number, supplementary information or reference to an antibody validation profile. e.g., Antibodypedia (see link list at top right), 1DegreeBio (see link list at top right). | Following antibodies were used: CD26 PercPcy5.5 (eBioscience, 45-0261), Ly-6A/E PE (eBioscience, Clone D7), CD45 APC (eBioscience, Clone), CD31 APC (eBioscience, Clone D7), CD234 APC (eBioscience, Clone D7), Dlk1 PE (MBL International, D187-5), Vimentin (Cell signalling, #5741), CD26 (R&D Systems, AF954), Sca1 (BD Pharmingen, clone E13-161.7), GFP (abcam, ab13970 and A-11122, ThermoFisher), Ki67 (abcam, ab16667 and Invitrogen, clone SolA15), $\alpha$ -sma (Abcam, ab5694), Krt14 (BioLegend, 906001) and CD49f (BioLegend, clone GoH3) |
|------------------------------------------------------------------------------------------------------------------------------------------------------------------------------------------------------------------------------------------------------------------------------------------------------------------------------|----------------------------------------------------------------------------------------------------------------------------------------------------------------------------------------------------------------------------------------------------------------------------------------------------------------------------------------------------------------------------------------------------------------------------------------------------------------------------------------------------------------------------------------------------------|

#### USEFUL LINKS FOR COMPLETING THIS FORM

|                                                                                                                                                                                             |                                                         |
|---------------------------------------------------------------------------------------------------------------------------------------------------------------------------------------------|---------------------------------------------------------|
| <a href="http://www.antibodypedia.com">http://www.antibodypedia.com</a>                                                                                                                     | Antibodypedia                                           |
| <a href="http://1degreebio.org">http://1degreebio.org</a>                                                                                                                                   | 1DegreeBio                                              |
| <a href="http://www.equator-network.org/reporting-guidelines/improving-bioscience-research-repo">http://www.equator-network.org/reporting-guidelines/improving-bioscience-research-repo</a> | ARRIVE Guidelines                                       |
| <a href="http://grants.nih.gov/grants/olaw/olaw.htm">http://grants.nih.gov/grants/olaw/olaw.htm</a>                                                                                         | NIH Guidelines in animal use                            |
| <a href="http://www.mrc.ac.uk/Ourresearch/Ethicsresearchguidance/Useofanimals/index.htm">http://www.mrc.ac.uk/Ourresearch/Ethicsresearchguidance/Useofanimals/index.htm</a>                 | MRC Guidelines on animal use                            |
| <a href="http://ClinicalTrials.gov">http://ClinicalTrials.gov</a>                                                                                                                           | Clinical Trial registration                             |
| <a href="http://www.consort-statement.org">http://www.consort-statement.org</a>                                                                                                             | CONSORT Flow Diagram                                    |
| <a href="http://www.consort-statement.org/checklists/view/32-consort/66-title">http://www.consort-statement.org/checklists/view/32-consort/66-title</a>                                     | CONSORT Check List                                      |
| <a href="http://www.equator-network.org/reporting-guidelines/reporting-recommendations-for-tun">http://www.equator-network.org/reporting-guidelines/reporting-recommendations-for-tun</a>   | REMARK Reporting Guidelines (marker prognostic studies) |
| <a href="http://datadryad.org">http://datadryad.org</a>                                                                                                                                     | Dryad                                                   |
| <a href="http://figshare.com">http://figshare.com</a>                                                                                                                                       | Figshare                                                |
| <a href="http://www.ncbi.nlm.nih.gov/gap">http://www.ncbi.nlm.nih.gov/gap</a>                                                                                                               | dbGAP                                                   |
| <a href="http://www.ebi.ac.uk/ega">http://www.ebi.ac.uk/ega</a>                                                                                                                             | EGA                                                     |
| <a href="http://biomodels.net/">http://biomodels.net/</a>                                                                                                                                   | Biomodels Database                                      |
| <a href="http://biomodels.net/miriam/">http://biomodels.net/miriam/</a>                                                                                                                     | MIRIAM Guidelines                                       |
| <a href="http://jij.biochem.sun.ac.za">http://jij.biochem.sun.ac.za</a>                                                                                                                     | JWS Online                                              |
| <a href="http://oba.od.nih.gov/biosecurity/biosecurity_documents.html">http://oba.od.nih.gov/biosecurity/biosecurity_documents.html</a>                                                     | Biosecurity Documents from NIH                          |
| <a href="http://www.selectagents.gov/">http://www.selectagents.gov/</a>                                                                                                                     | List of Select Agents                                   |



|                                                                                                                                                       |                                                                                                                                                                                                                                                                                                                                                                                                                                                                                                      |
|-------------------------------------------------------------------------------------------------------------------------------------------------------|------------------------------------------------------------------------------------------------------------------------------------------------------------------------------------------------------------------------------------------------------------------------------------------------------------------------------------------------------------------------------------------------------------------------------------------------------------------------------------------------------|
| 7. Identify the source of cell lines and report if they were recently authenticated (e.g., by STR profiling) and tested for mycoplasma contamination. | Stock cultures of primary normal human keratinocytes (NHKs, strain km) were obtained from surgically discarded foreskin and grown on 3T3-J2 feeder cells. NHKs were used for DED experiments between passages 2–5. 3T3-J2 fibroblasts were originally obtained from Dr James Rheinwald (Department of Dermatology, Skin Disease Research Center, Brigham and Women's Hospital, Boston, MA), not authenticated. All cell stocks were routinely tested for mycoplasma contamination and were negative. |
|-------------------------------------------------------------------------------------------------------------------------------------------------------|------------------------------------------------------------------------------------------------------------------------------------------------------------------------------------------------------------------------------------------------------------------------------------------------------------------------------------------------------------------------------------------------------------------------------------------------------------------------------------------------------|

\* for all hyperlinks, please see the table at the top right of the document

#### D- Animal Models

|                                                                                                                                                                                                                                                                                                                                                                                    |                                                                                                                                                                                                                                                                                                                                                                                                                                                                                                                                                                                                                                                                                                                                                                                                               |
|------------------------------------------------------------------------------------------------------------------------------------------------------------------------------------------------------------------------------------------------------------------------------------------------------------------------------------------------------------------------------------|---------------------------------------------------------------------------------------------------------------------------------------------------------------------------------------------------------------------------------------------------------------------------------------------------------------------------------------------------------------------------------------------------------------------------------------------------------------------------------------------------------------------------------------------------------------------------------------------------------------------------------------------------------------------------------------------------------------------------------------------------------------------------------------------------------------|
| 8. Report species, strain, gender, age of animals and genetic modification status where applicable. Please detail housing and husbandry conditions and the source of animals.                                                                                                                                                                                                      | Animals were housed in IVC cages under standard condition and diet at the Biological Service Unit (BSU), King's College London. All mice were outbred on a C57BL6/JBA background and male and female mice were used in experiments that included Blimp1-Cre (Robertson et al, 2007, Development), Dlx1CreERT2 (Diskell et al, 2013, Nature), Lrig1CreER (Page et al, 2013, Cell Stem Cell), PDGFR $\alpha$ H2BeGFP (Hamilton et al, 2003, Mol Cell Biol), ROSAfl-stopfl-tdTomato (Jackson Laboratories, 007905), CAGCAtEGFP (Kawamoto et al, 2000, FEBS Letters), Dermo1Cre (Jackson Laboratories, 008712), R26Fucci2a (Mort et al, 2014, Cell Cycle) and Confetti mice (Snippert et al, 2010, Cell). Age information is provided either in the figure and figure legend or in the Result and Method section. |
| 9. For experiments involving live vertebrates, include a statement of compliance with ethical regulations and identify the committee(s) approving the experiments.                                                                                                                                                                                                                 | All experimental procedures were carried out under the terms of a UK Home Office project license (PPL 70/8474) after local ethical review at King's College London.                                                                                                                                                                                                                                                                                                                                                                                                                                                                                                                                                                                                                                           |
| 10. We recommend consulting the ARRIVE guidelines (see link list at top right) (PLoS Biol. 8(6), e1000412, 2010) to ensure that other relevant aspects of animal studies are adequately reported. See author guidelines, under 'Reporting Guidelines'. See also: NIH (see link list at top right) and MRC (see link list at top right) recommendations. Please confirm compliance. | Our study complies with the ARRIVE guidelines.                                                                                                                                                                                                                                                                                                                                                                                                                                                                                                                                                                                                                                                                                                                                                                |

#### E- Human Subjects

|                                                                                                                                                                                                                                                                                                                    |                                                                                                                                                                                                                                                                                                                                                                                                                           |
|--------------------------------------------------------------------------------------------------------------------------------------------------------------------------------------------------------------------------------------------------------------------------------------------------------------------|---------------------------------------------------------------------------------------------------------------------------------------------------------------------------------------------------------------------------------------------------------------------------------------------------------------------------------------------------------------------------------------------------------------------------|
| 11. Identify the committee(s) approving the study protocol.                                                                                                                                                                                                                                                        | Human fetal tissue was obtained with appropriate ethical approval from the UK Human Developmental Biology Resource. Adult surgical waste skin from written consenting patients under going plastic surgery was obtained from St George's University Hospitals NHS Foundation Trust and the study was ethically approved by the National Research Ethics Service Committee UK (HTA Licence No: 12121, REC-No: 14/NS/1073). |
| 12. Include a statement confirming that informed consent was obtained from all subjects and that the experiments conformed to the principles set out in the WMA Declaration of Helsinki and the Department of Health and Human Services Belmont Report.                                                            | Is included and see answer above.                                                                                                                                                                                                                                                                                                                                                                                         |
| 13. For publication of patient photos, include a statement confirming that consent to publish was obtained.                                                                                                                                                                                                        | NA                                                                                                                                                                                                                                                                                                                                                                                                                        |
| 14. Report any restrictions on the availability (and/or on the use) of human data or samples.                                                                                                                                                                                                                      | NA                                                                                                                                                                                                                                                                                                                                                                                                                        |
| 15. Report the clinical trial registration number (at ClinicalTrials.gov or equivalent), where applicable.                                                                                                                                                                                                         | NA                                                                                                                                                                                                                                                                                                                                                                                                                        |
| 16. For phase II and III randomized controlled trials, please refer to the CONSORT flow diagram (see link list at top right) and submit the CONSORT checklist (see link list at top right) with your submission. See author guidelines, under 'Reporting Guidelines'. Please confirm you have submitted this list. | NA                                                                                                                                                                                                                                                                                                                                                                                                                        |
| 17. For tumor marker prognostic studies, we recommend that you follow the REMARK reporting guidelines (see link list at top right). See author guidelines, under 'Reporting Guidelines'. Please confirm you have followed these guidelines.                                                                        | NA                                                                                                                                                                                                                                                                                                                                                                                                                        |

#### F- Data Accessibility

|                                                                                                                                                                                                                                                                                                                                                                                                                                                                                                                                                                                                                                                                                                   |                                                                                                                                                              |
|---------------------------------------------------------------------------------------------------------------------------------------------------------------------------------------------------------------------------------------------------------------------------------------------------------------------------------------------------------------------------------------------------------------------------------------------------------------------------------------------------------------------------------------------------------------------------------------------------------------------------------------------------------------------------------------------------|--------------------------------------------------------------------------------------------------------------------------------------------------------------|
| 18. Provide a "Data Availability" section at the end of the Materials & Methods, listing the accession codes for data generated in this study and deposited in a public database (e.g. RNA-Seq data: Gene Expression Omnibus GSE39462, Proteomics data: PRIDE PXD000208 etc.) Please refer to our author guidelines for 'Data Deposition'.<br><br>Data deposition in a public repository is mandatory for:<br>a. Protein, DNA and RNA sequences<br>b. Macromolecular structures<br>c. Crystallographic data for small molecules<br>d. Functional genomics data<br>e. Proteomics and molecular interactions                                                                                        | All transcriptomic data used in this study have been published previously and have been deposited (GEO GSE32966) .                                           |
| 19. Deposition is strongly recommended for any datasets that are central and integral to the study; please consider the journal's data policy. If no structured public repository exists for a given data type, we encourage the provision of datasets in the manuscript as a Supplementary Document (see author guidelines under 'Expanded View' or in unstructured repositories such as Dryad (see link list at top right) or Figshare (see link list at top right)).                                                                                                                                                                                                                           | NA                                                                                                                                                           |
| 20. Access to human clinical and genomic datasets should be provided with as few restrictions as possible while respecting ethical obligations to the patients and relevant medical and legal issues. If practically possible and compatible with the individual consent agreement used in the study, such data should be deposited in one of the major public access-controlled repositories such as dbGAP (see link list at top right) or EGA (see link list at top right).                                                                                                                                                                                                                     | NA                                                                                                                                                           |
| 21. Computational models that are central and integral to a study should be shared without restrictions and provided in a machine-readable form. The relevant accession numbers or links should be provided. When possible, standardized format (SBML, CellML) should be used instead of scripts (e.g. MATLAB). Authors are strongly encouraged to follow the MIRIAM guidelines (see link list at top right) and deposit their model in a public database such as Biocompare (see link list at top right) or JWS Online (see link list at top right). If computer source code is provided with the paper, it should be deposited in a public repository or included in supplementary information. | Our CC3D model computer code is available on GitHub: <a href="https://github.com/aopisco/DermisMaturation">https://github.com/aopisco/DermisMaturation</a> . |

#### G- Dual use research of concern

|                                                                                                                                                                                                                                                                                               |    |
|-----------------------------------------------------------------------------------------------------------------------------------------------------------------------------------------------------------------------------------------------------------------------------------------------|----|
| 22. Could your study fall under dual use research restrictions? Please check biosecurity documents (see link list at top right) and list of select agents and toxins (APHIS/CDC) (see link list at top right). According to our biosecurity guidelines, provide a statement only if it could. | NA |
|-----------------------------------------------------------------------------------------------------------------------------------------------------------------------------------------------------------------------------------------------------------------------------------------------|----|
